# Supplementary material for: Marathon race performance increases the amount of particulate matter deposited in the respiratory system of runners: an incentive for “clean air marathon runs”
Source: PeerJ. 2021 Jun 17;9:e11562. doi: 10.7717/peerj.11562 (PMC8214849; doi:10.7717/peerj.11562)
Supplement: Supplemental Information 1 [file peerj-09-11562-s001.xlsx]

## Sheet: Arkusz1
2019-01-01	6.69768
2019-01-02	7.78095
2019-01-03	4.47746
2019-01-04	25.576
2019-01-05	19.9953
2019-01-06	5.44431
2019-01-07	28.0686
2019-01-08	12.3486
2019-01-09	22.9959
2019-01-10	58.8799
2019-01-11	56.4542
2019-01-12	33.4172
2019-01-13	9.70477
2019-01-14	1.70523
2019-01-15	12.7155
2019-01-16	14.3406
2019-01-17	5.08064
2019-01-18	10.6561
2019-01-19	15.4761
2019-01-20	109.537
2019-01-21	123.977
2019-01-22	108.085
2019-01-23	36.4065
2019-01-24	26.2534
2019-01-25	44.3577
2019-01-26	39.4014
2019-01-27	10.6035
2019-01-28	62.6741
2019-01-29	19.184
2019-01-30	53.1834
2019-01-31	79.5661
2019-02-01	49.3702
2019-02-02	5.25054
2019-02-03	73.4968
2019-02-04	16.0901
2019-02-05	21.1804
2019-02-06	27.8905
2019-02-07	57.7587
2019-02-08	48.2205
2019-02-09	96.9155
2019-02-10	5.16172
2019-02-11	3.64008
2019-02-12	3.78419
2019-02-13	11.6671
2019-02-14	20.7986
2019-02-15	25.2897
2019-02-16	20.8113
2019-02-17	23.7518
2019-02-18	40.7494
2019-02-19	40.9525
2019-02-20	20.3409
2019-02-21	14.0292
2019-02-22	1.5871
2019-02-23	3.56072
2019-02-24	29.3773
2019-02-25	23.7041
2019-02-26	21.5939
2019-02-27	32.1847
2019-02-28	12.0521
2019-03-01	40.6473
2019-03-02	10.6403
2019-03-03	10.1471
2019-03-04	0.49835
2019-03-05	0.129351
2019-03-06	7.60972
2019-03-07	2.90987
2019-03-08	0.0632004
2019-03-09	0.804969
2019-03-10	0.458176
2019-03-11	1.26588
2019-03-12	6.98178
2019-03-13	2.33492
2019-03-14	1.92367
2019-03-15	2.82335
2019-03-16	0.821486
2019-03-17	0.0853912
2019-03-18	2.85655
2019-03-19	4.67701
2019-03-20	14.9307
2019-03-21	30.3918
2019-03-22	32.1268
2019-03-23	25.1612
2019-03-24	15.8551
2019-03-25	16.2001
2019-03-26	7.91142
2019-03-27	4.21949
2019-03-28	26.4148
2019-03-29	31.9589
2019-03-30	23.0107
2019-03-31	16.1293
2019-04-01	0.571231
2019-04-02	5.8994
2019-04-03	11.3986
2019-04-04	15.0937
2019-04-05	9.56709
2019-04-06	32.4859
2019-04-07	20.9835
2019-04-08	16.4596
2019-04-09	20.1456
2019-04-10	13.7123
2019-04-11	23.5205
2019-04-12	20.3003
2019-04-13	30.9873
2019-04-14	12.57
2019-04-15	5.45543
2019-04-16	4.69077
2019-04-17	16.8864
2019-04-18	8.02431
2019-04-19	3.07964
2019-04-20	5.84825
2019-04-21	1.05455
2019-04-22	3.14832
2019-04-23	5.99225
2019-04-24	4.77673
2019-04-25	1.79847
2019-04-26	0.864946
2019-04-27	8.88167
2019-04-28	21.7402
2019-04-29	13.9423
2019-04-30	11.3158
2019-05-01	2.42927
2019-05-02	9.67089
2019-05-03	15.1601
2019-05-04	2.17855
2019-05-05	6.29729
2019-05-06	0.372111
2019-05-07	1.16524
2019-05-08	3.23808
2019-05-09	7.19284
2019-05-10	0.858479
2019-05-11	0.298973
2019-05-12	17.8664
2019-05-13	1.46131
2019-05-14	1.05512
2019-05-15	3.6107
2019-05-16	9.8226
2019-05-17	11.9291
2019-05-18	3.40685
2019-05-19	7.61816
2019-05-20	0.548339
2019-05-21	4.88757
2019-05-22	4.488
2019-05-23	3.07982
2019-05-24	33.3324
2019-05-25	2.71162
2019-05-26	5.96419
2019-05-27	3.46972
2019-05-28	5.01665
2019-05-29	2.21553
2019-05-30	0.45998
2019-05-31	2.69706
2019-06-01	2.85011
2019-06-02	2.6938
2019-06-03	1.80338
2019-06-04	2.46434
2019-06-05	3.89653
2019-06-06	2.00622
2019-06-07	5.75872
2019-06-08	4.48085
2019-06-09	0.0853052
2019-06-10	7.02265
2019-06-11	1.66733
2019-06-12	1.87904
2019-06-13	2.97113
2019-06-14	7.26392
2019-06-15	7.54758
2019-06-16	2.07865
2019-06-17	0.442398
2019-06-18	3.95328
2019-06-19	4.89805
2019-06-20	4.24194
2019-06-21	4.7201
2019-06-22	7.74477
2019-06-23	0.534816
2019-06-24	0.815057
2019-06-25	7.97675
2019-06-26	7.12606
2019-06-27	1.90333
2019-06-28	3.21261
2019-06-29	0.137833
2019-06-30	0.745254
